# Supplementary material for: Unique switching mode of HfO2 among fluorite-type ferroelectric candidates
Source: Royal Society of Chemistry journal article supplement (doi:10.1039/d4tc02418d), 2024-01-01
Supplement: d4tc02418d1.pdf [file d4tc02418d1.pdf]

## Supporting Information for

### **Unique switching mode of HfO<sub>2</sub> among fluorite-type ferroelectric candidates**

Ge-Qi Mao,<sup>1,#</sup> Heng Yu,<sup>1,#</sup> Kan-Hao Xue,<sup>1,2,a)</sup> Jinhai Huang,<sup>1</sup> Zijian Zhou,<sup>1</sup> and Xiangshui Miao<sup>1,2</sup>

<sup>1</sup>School of Integrated Circuits, Huazhong University of Science and Technology, Wuhan 430074, China

<sup>2</sup>Hubei Yangtze Memory Laboratories, Wuhan 430205, China

<sup>a)</sup>Author to whom correspondence should be addressed: [xkh@hust.edu.cn](mailto:xkh@hust.edu.cn)

<sup>#</sup>These authors contributed equally.

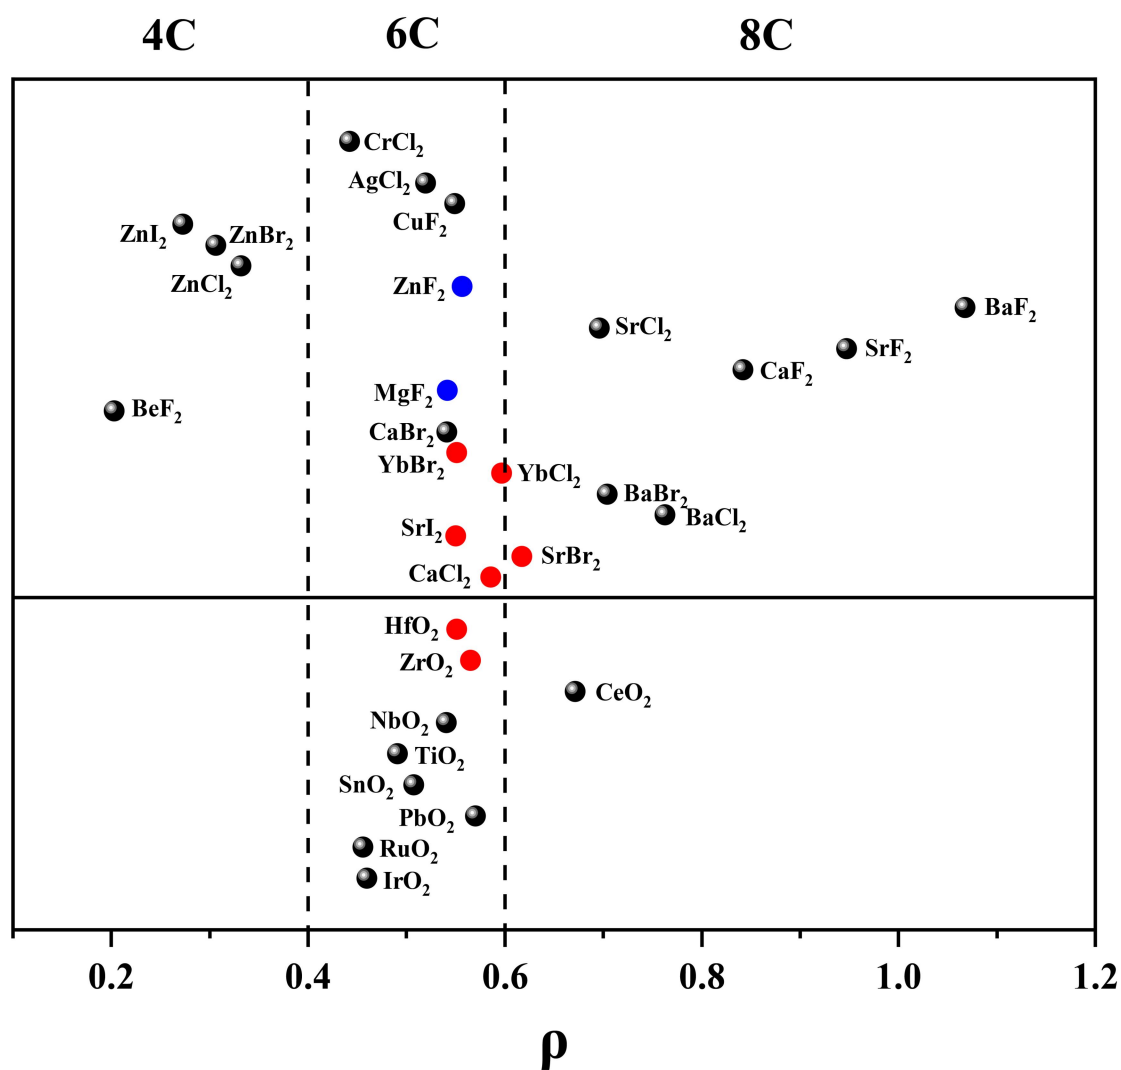

**Figure S1 :** Statistical graph of coordination number and radius ration of common binary materials.

**Figure S1** shows the relationship between the cation/anion radius ratio and the coordination number of common binary compounds. It can be seen that  $\rho=0.6$  is the boundary between 6C and 8C. The radius ratio of HfO<sub>2</sub>, ZrO<sub>2</sub>, SrI<sub>2</sub>, SrBr<sub>2</sub>, CaCl<sub>2</sub>, YbCl<sub>2</sub> and YbBr<sub>2</sub> is around 0.6, marked with a red ball. The radius ratio of MgF<sub>2</sub> and ZnF<sub>2</sub> is also around 0.6, marked with a blue ball. However, these two materials cannot maintain limited spontaneous polarization under the *Pca*2<sub>1</sub> phase via our calculations, so MgF<sub>2</sub> and ZnF<sub>2</sub> are not discussed in manuscript.

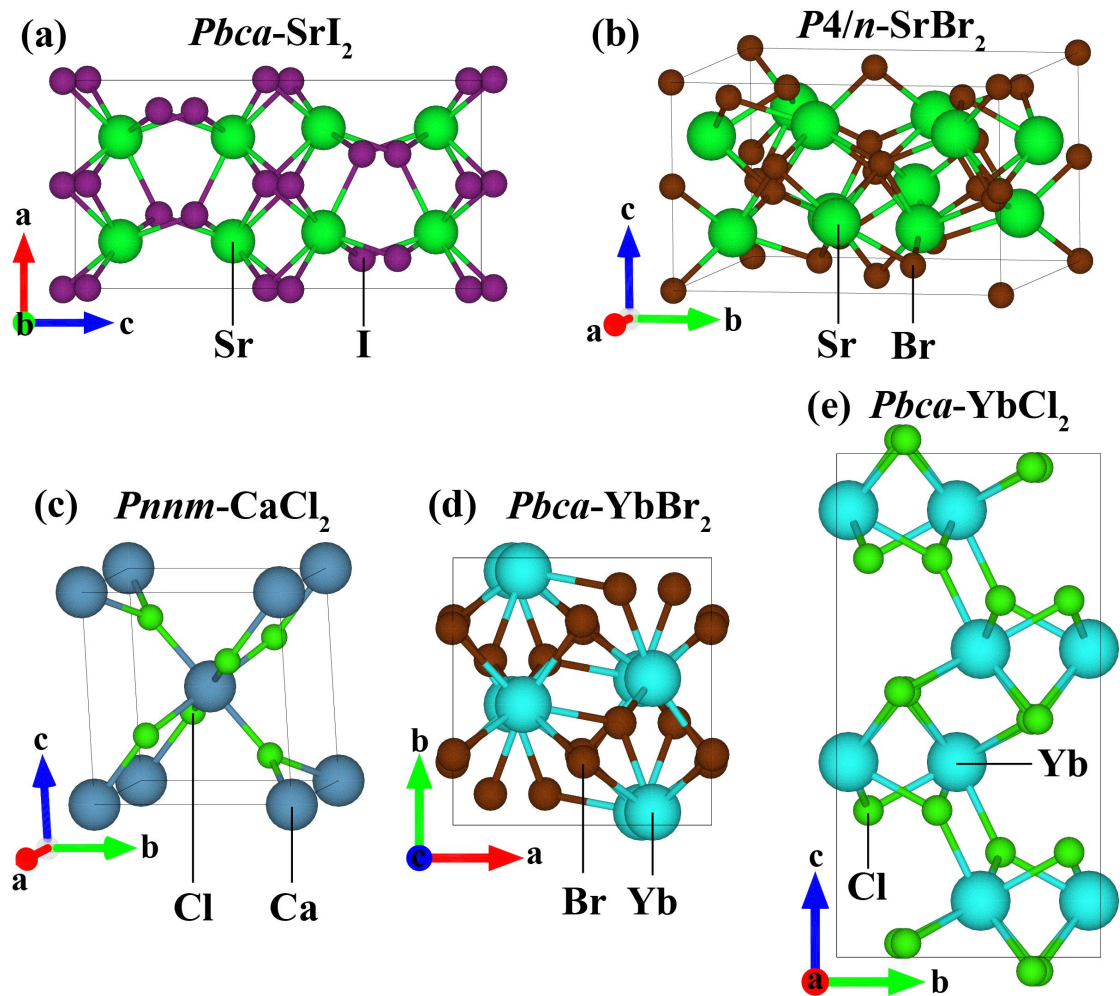

**Figure S2.** The schematic diagrams of the ground-state structures for the five materials, where (a), (d), and (e) represent illustrations of the *PbcA* structure viewed along three different orientations.

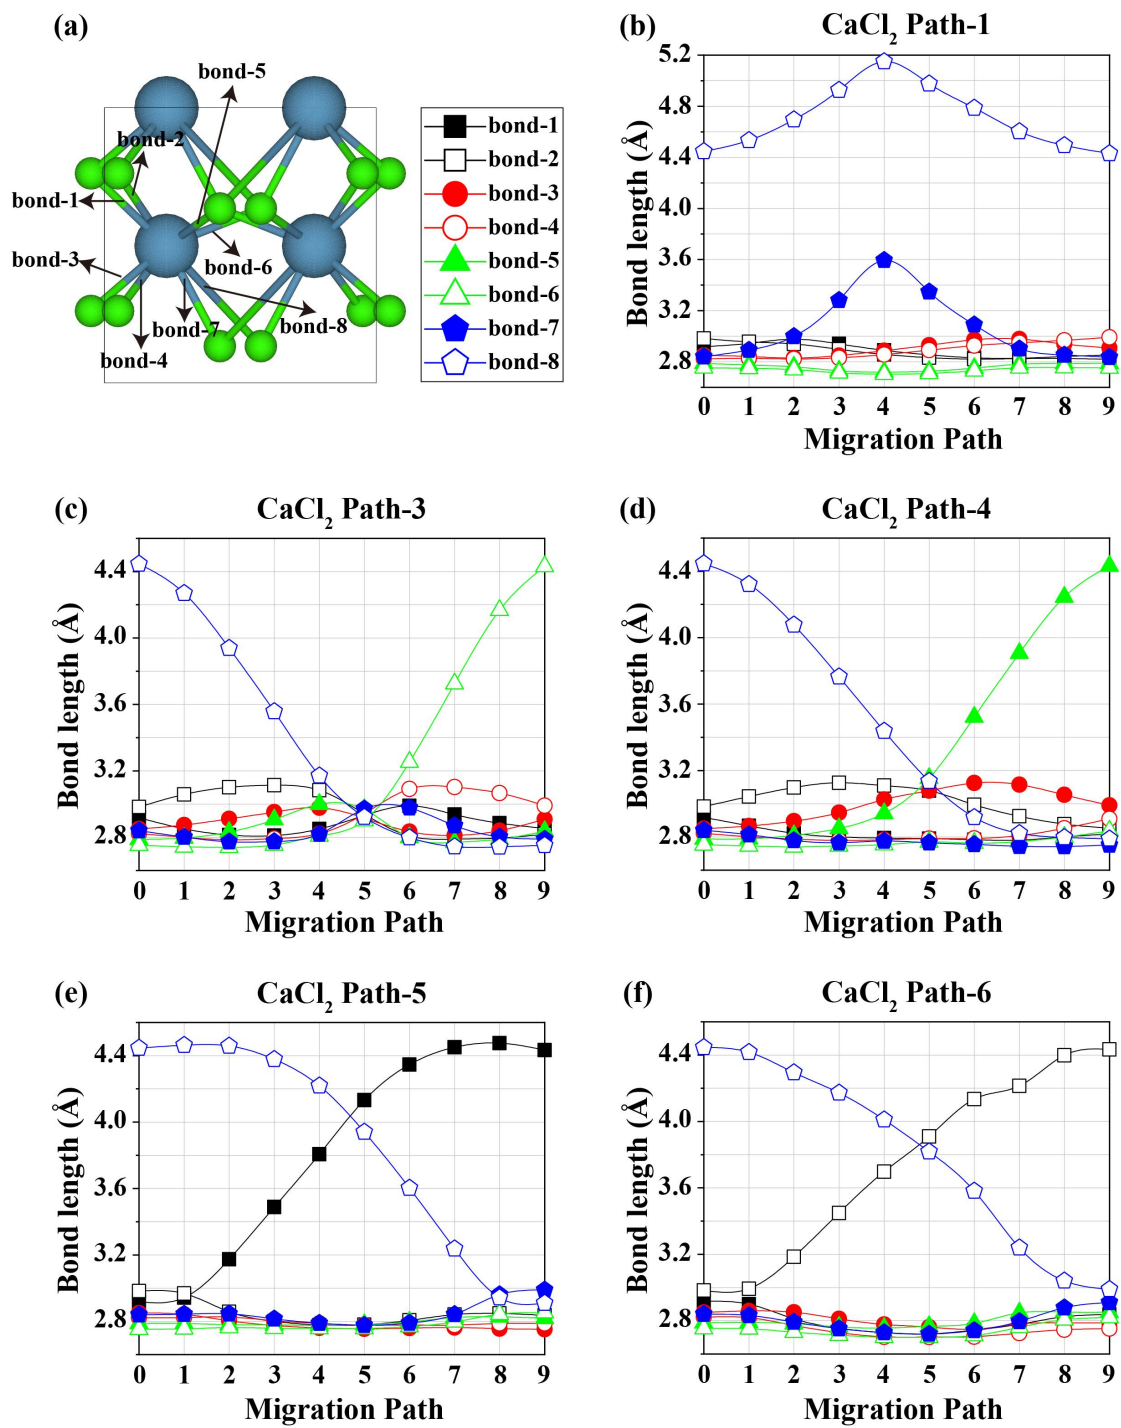

Figure S3. Graphs of bond length variations along the five polarization switching pathways in  $\text{CaCl}_2$ .

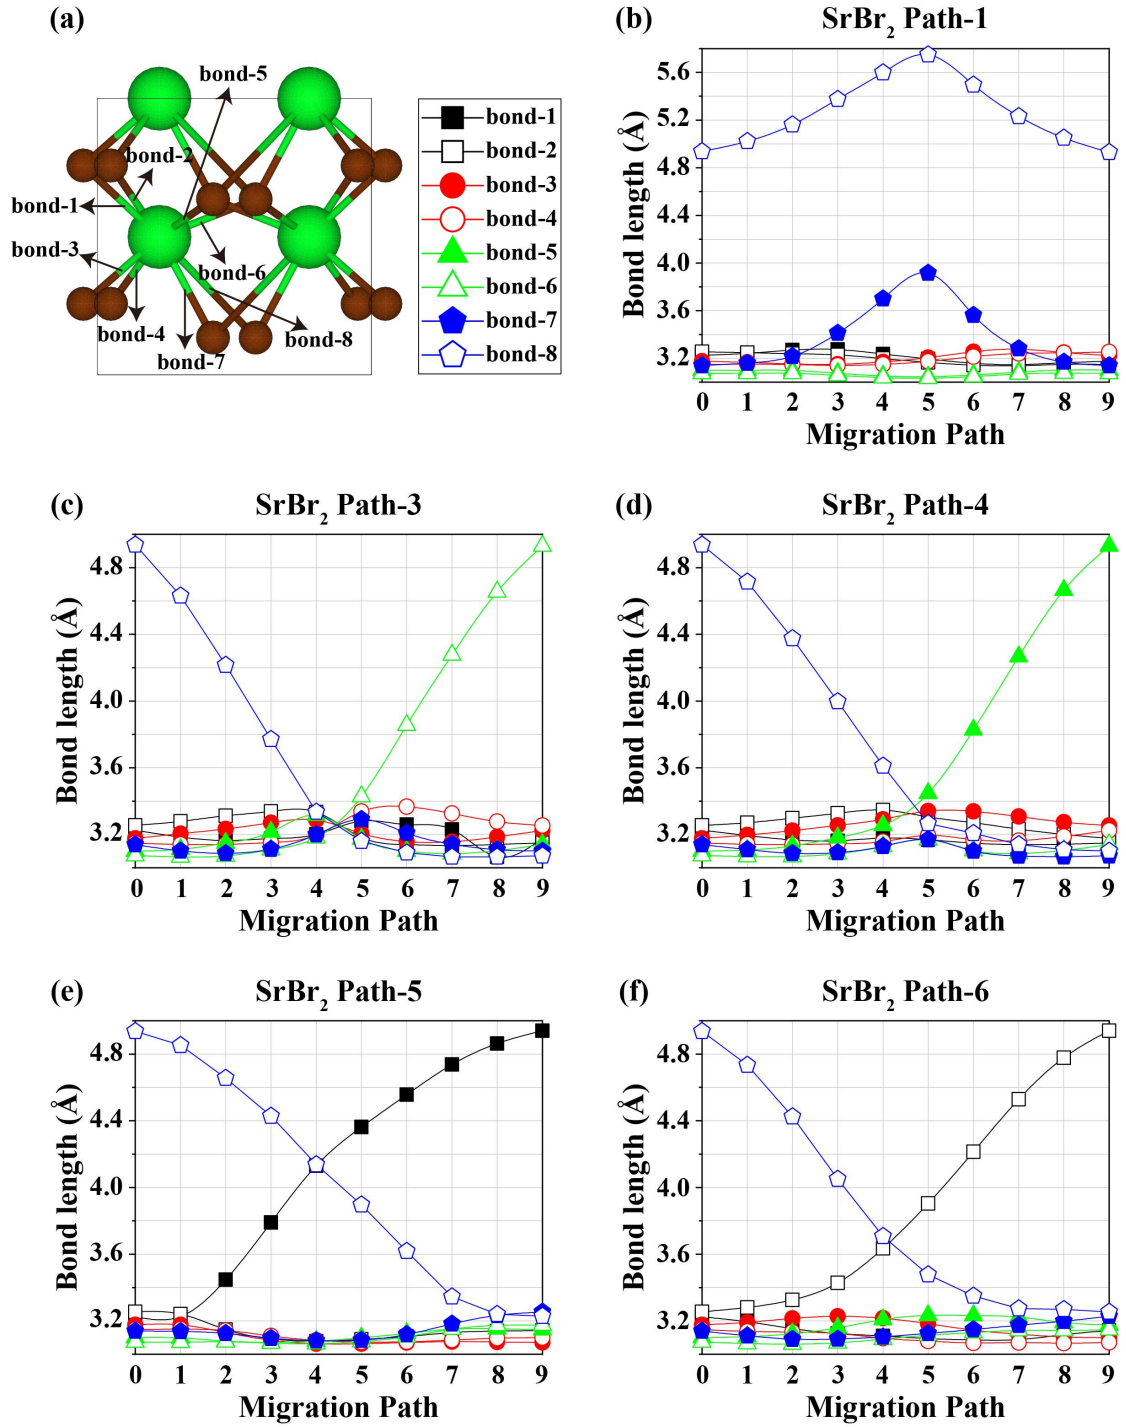

**Figure S4.** Graphs of bond length variations along the five polarization switching pathways in

SrBr<sub>2</sub>.

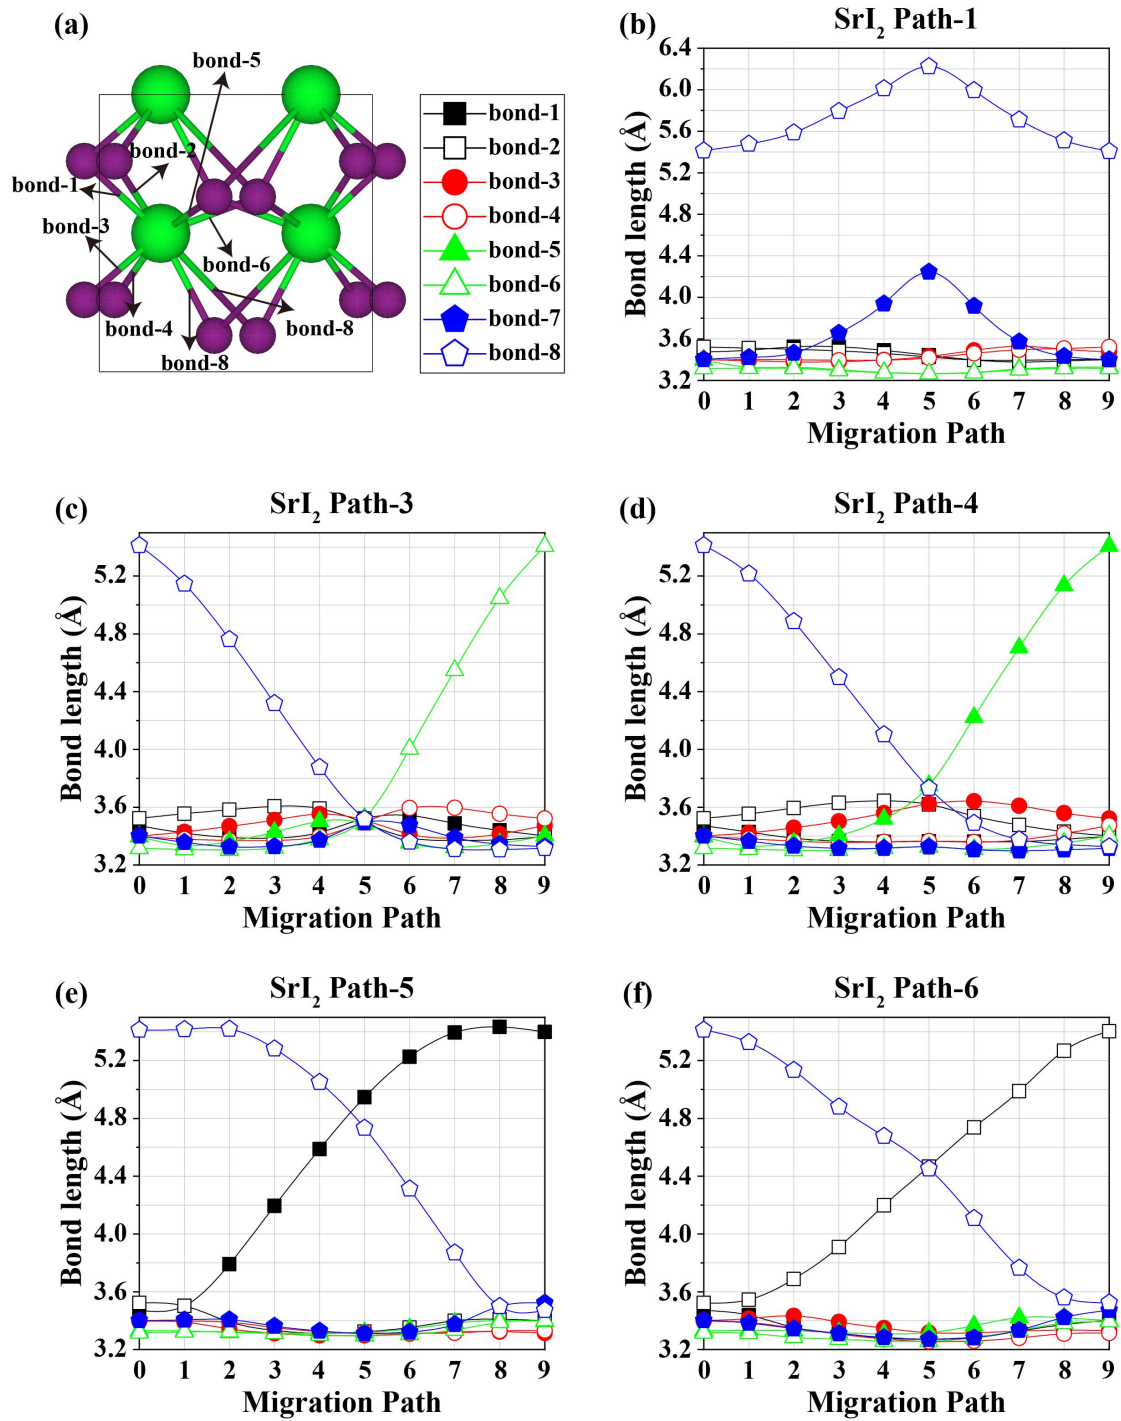

Figure S5. Graphs of bond length variations along the five polarization switching pathways in

SrI<sub>2</sub>.

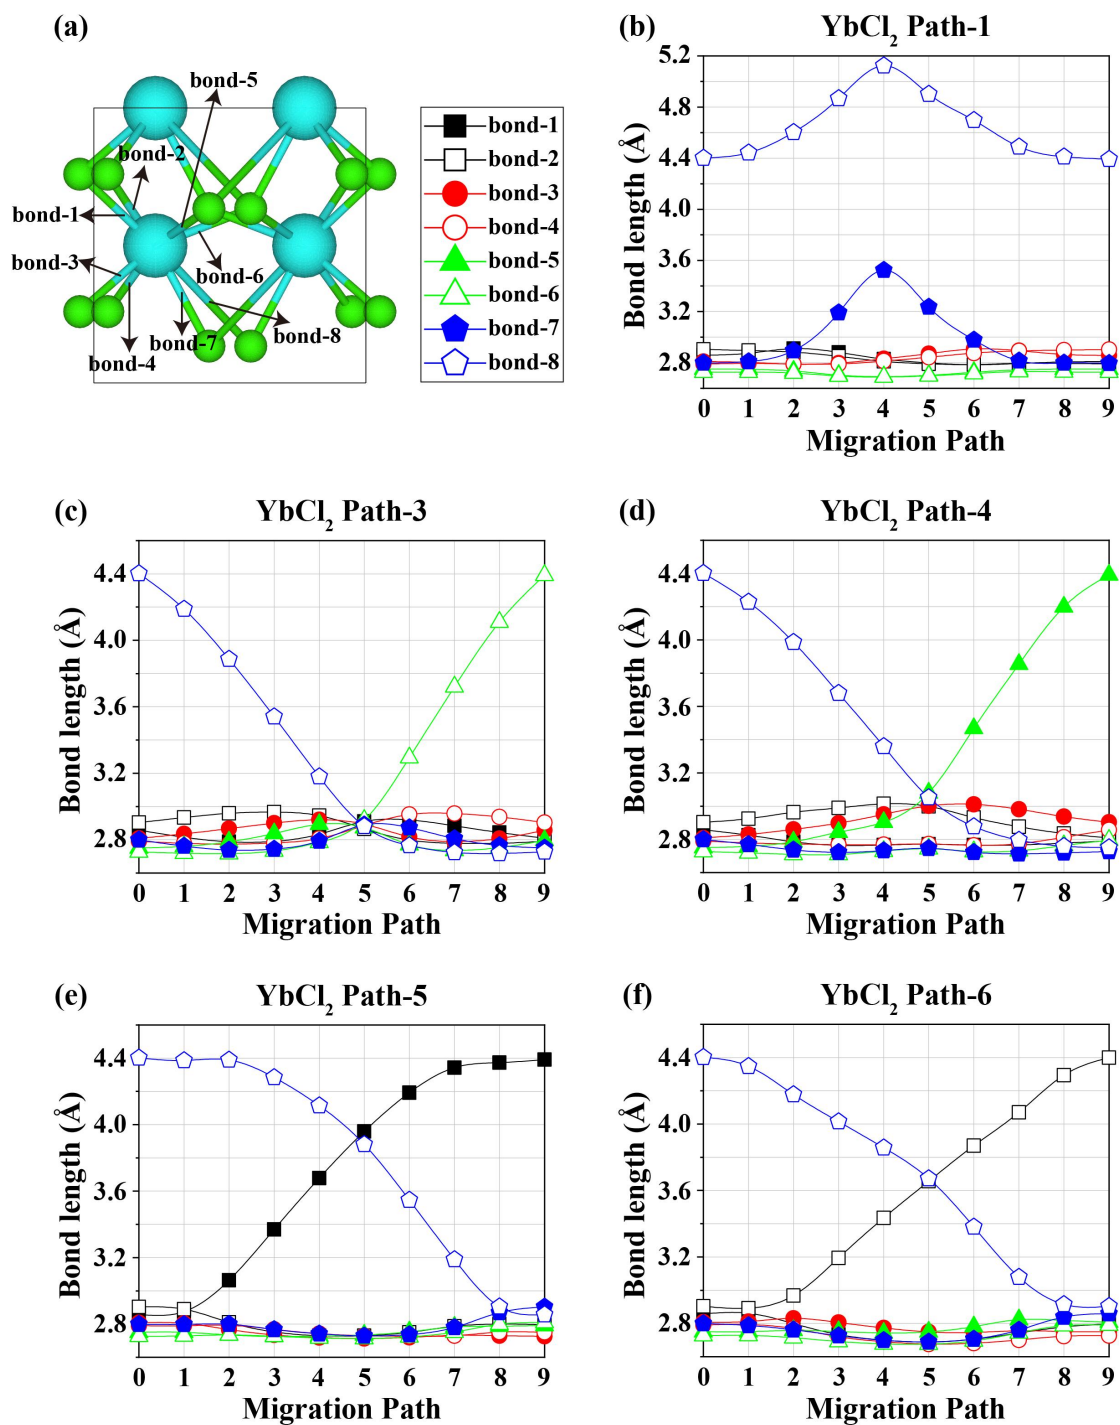

**Figure S6.** Graphs of bond length variations along the five polarization switching pathways in YbCl<sub>2</sub>.

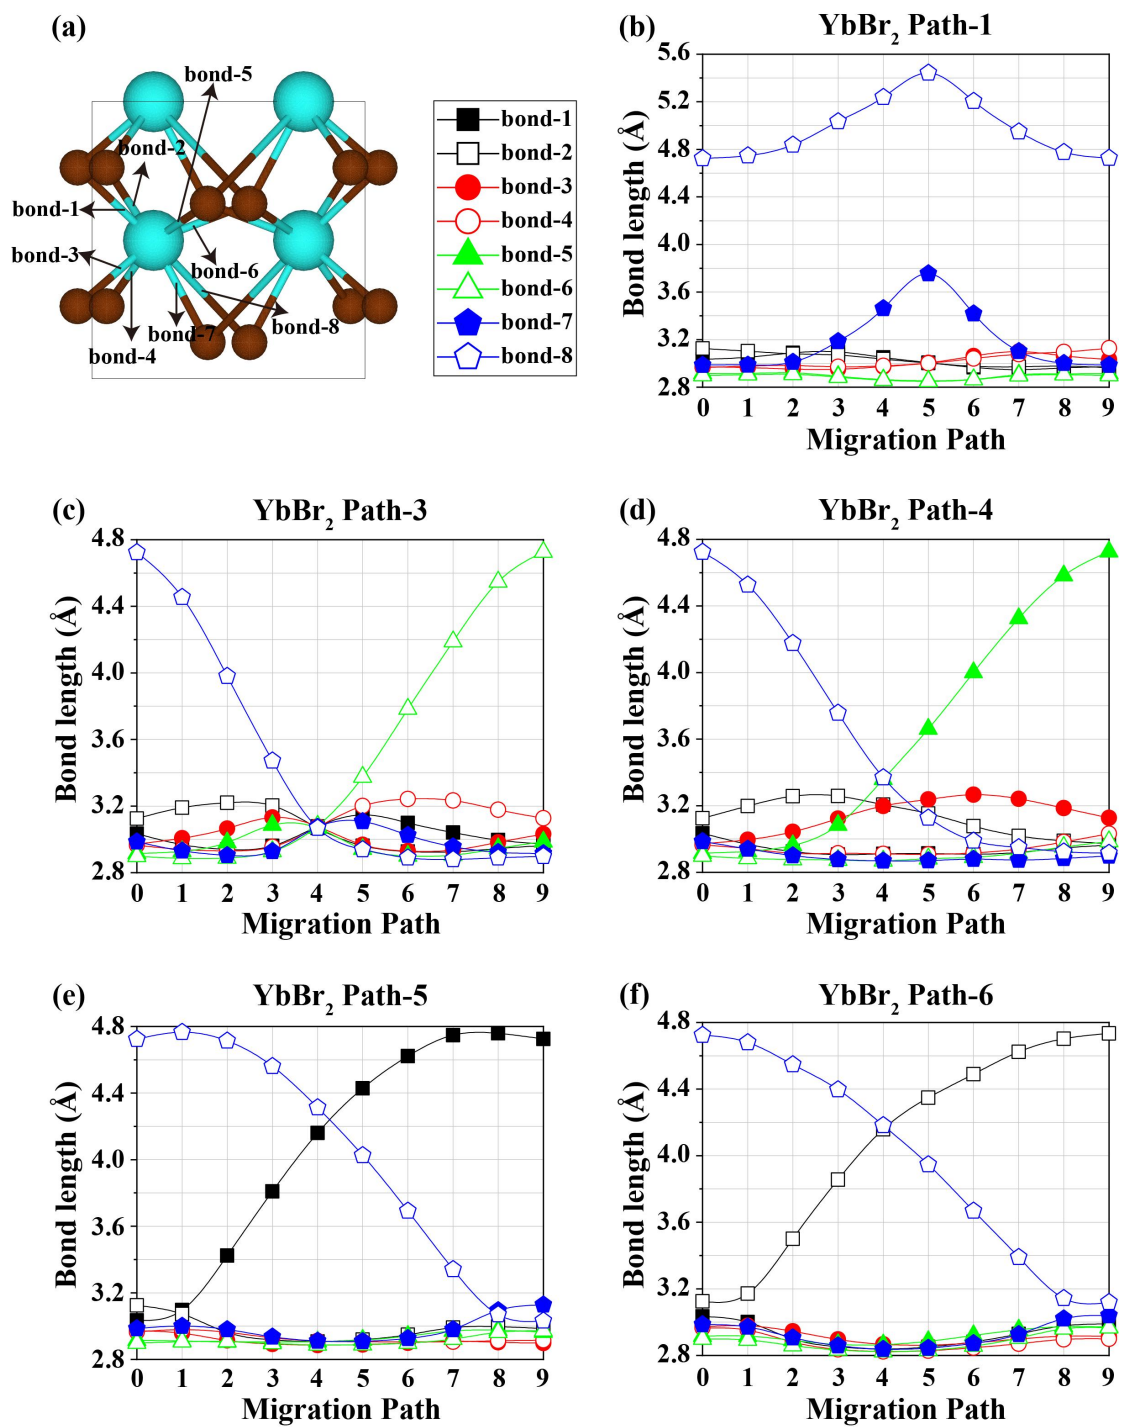

Figure S7. Graphs of bond length variations along the five polarization switching pathways

in YbBr<sub>2</sub>.



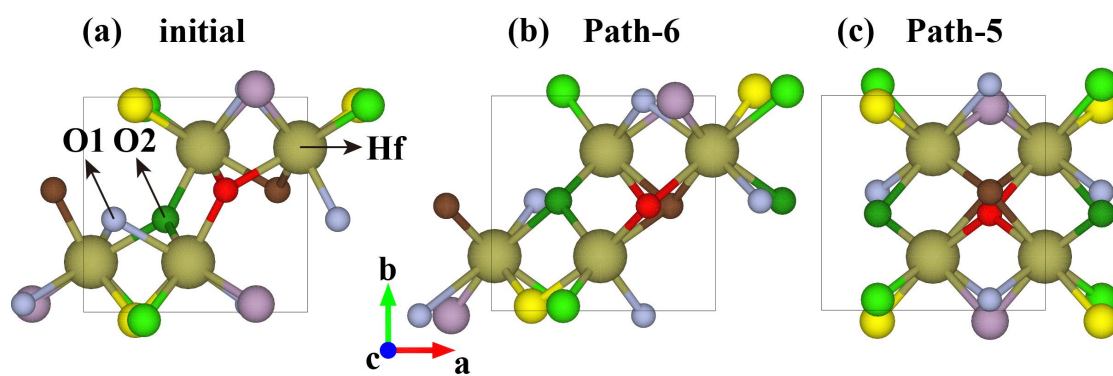

**Figure S8.** Structures of the ferroelectric phase of  $\text{HfO}_2$ : (a) initial state, (b) intermediate state along Path-6, (c) intermediate state along Path-5. The four Hf elements (larger spheres) are depicted in the same color, while the other eight atoms (smaller spheres) are all Oxygen atoms and are differentiated by various colors.

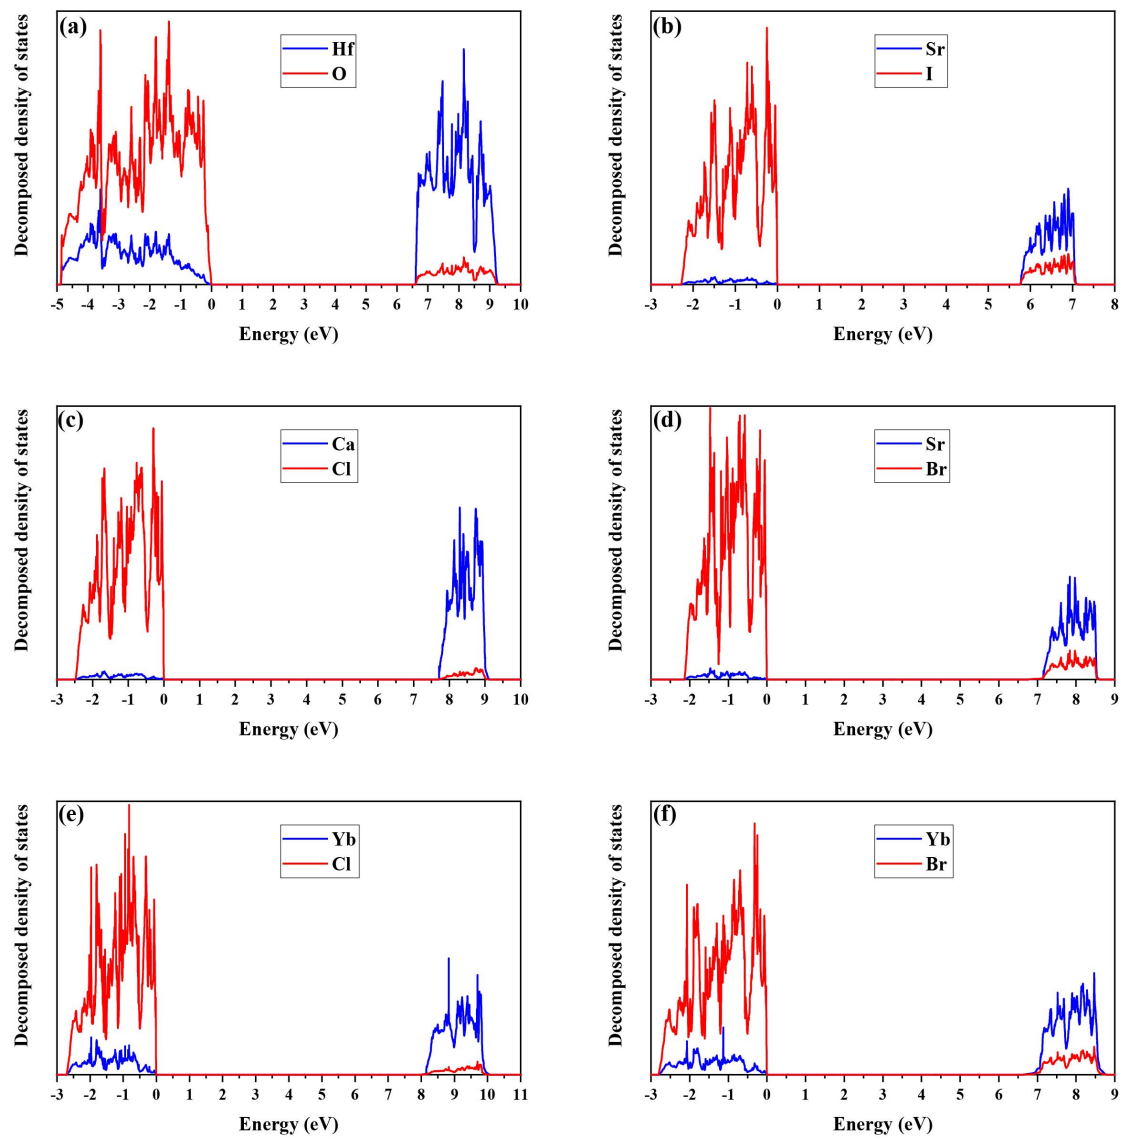

**Figure S9.** Decomposed density of states of CaCl<sub>2</sub>, SrBr<sub>2</sub>, YbCl<sub>2</sub>, YbBr<sub>2</sub> and ZrO<sub>2</sub>, calculated using the shell DFT-1/2 method.

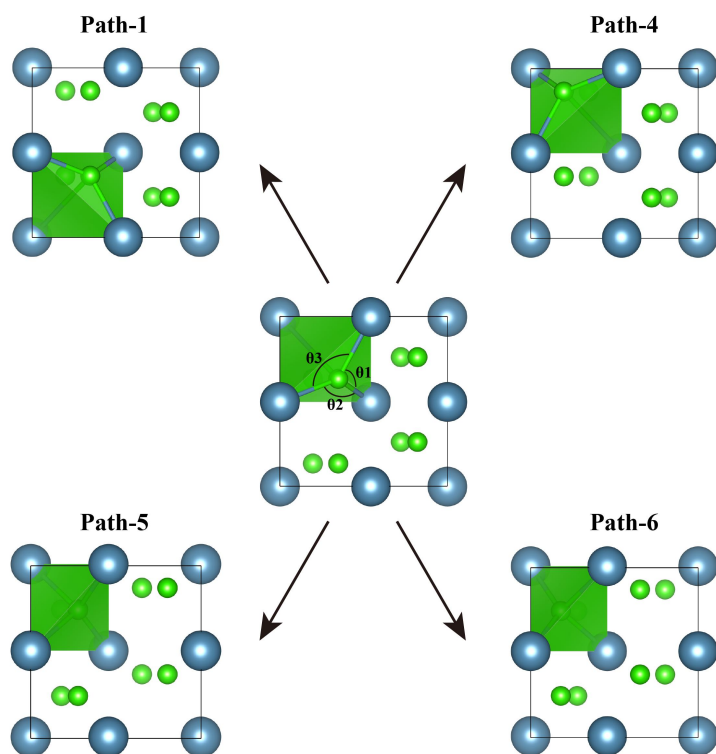

**Figure S10:** Tetrahedral cage structures of  $\text{CaCl}_2$ , showing the initial structure and final structures for Path-1, Path-4, Path-5 and Path-6 as switching paths.

The positions of  $\text{O}_{\text{III}}$  anions in  $\text{CaCl}_2$ ,  $\text{SrI}_2$ ,  $\text{SrBr}_2$ ,  $\text{YbCl}_2$  and  $\text{YbBr}_2$  are very similar as in  $\text{HfO}_2$ . As showing in **Figure S10**, taking  $\text{CaCl}_2$  as an example,  $\text{O}_{\text{III}}$  anions in  $\text{CaCl}_2$  appear at the surfaces of specific tetrahedra. A simple proof is given here, if the sum of  $\theta_1$ ,  $\theta_2$  and  $\theta_3$  (**Figure S10**) adds up to  $180^\circ$ , it is proved that the  $\text{O}_{\text{III}}$  is on the plane. The sum of the angles are  $359.638^\circ$ ,  $359.012^\circ$ ,  $358.336^\circ$ ,  $358.863^\circ$ ,  $358.840^\circ$  and  $358.775^\circ$  for  $\text{HfO}_2$ ,  $\text{CaCl}_2$ ,  $\text{SrI}_2$ ,  $\text{SrBr}_2$ ,  $\text{YbCl}_2$  and  $\text{YbBr}_2$ , which are very close to  $360^\circ$ .

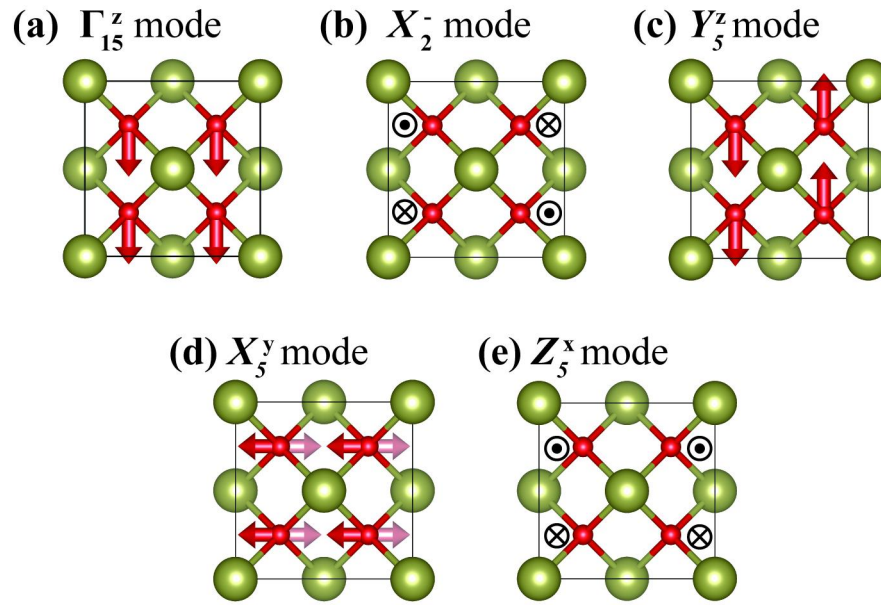

**Figure S11:** Diagrams of oxygen displacements in five different phonon modes  $\Gamma_{15}^z$ ,  $X_2^-$ ,  $Y_5^z$ ,  $X_5^y$  and  $Z_5^x$ .
